# Supplementary material for: Chitin promotes antigen-specific Th2 cell-mediated murine asthma through induction of IL-33-mediated IL-1β production by DCs
Source: PubMed Central journal article supplement (PMC6079063; doi:10.1038/s41598-018-30259-2), 2018-08-06
Supplement: 41598_2018_30259_MOESM1_ESM.pdf [file 41598_2018_30259_MOESM1_ESM.pdf]

**Chitin promotes antigen-specific Th2 cell-mediated murine asthma through induction of IL-33-mediated IL-1 $\beta$  production by DCs**

Ken Arae<sup>1,2</sup>, Hideaki Morita<sup>2</sup>, Hirotohi Unno<sup>2</sup>, Kenichiro Motomura<sup>2</sup>, Sumika Toyama<sup>2</sup>, Naoko Okada<sup>2</sup>, Tatsukuni Ohno<sup>3</sup>, Masato Tamari<sup>2</sup>, Keisuke Orimo<sup>2</sup>, Yuko Mishima<sup>1</sup>, Hajime Suto<sup>4</sup>, Ko Okumura<sup>4</sup>, Katsuko Sudo<sup>5</sup>, Hiroshi Miyazawa<sup>6</sup>, Haruhiko Taguchi<sup>1</sup>, Hirohisa Saito<sup>2</sup>, Kenji Matsumoto<sup>2</sup>, and Susumu Nakae<sup>7,8,\*</sup>

<sup>1</sup>Department of Immunology, <sup>6</sup>Department of Medical technology, Faculty of Health Sciences, Kyorin University, Tokyo, 181-8612, Japan; <sup>2</sup>Department of Allergy and Clinical Immunology, National Research Institute for Child Health and Development, Tokyo, 157-8535, Japan; <sup>3</sup>Department of Molecular Immunology, Graduate School of Medical and Dental Sciences, Tokyo Medical and Dental University, Tokyo, 113-8510, Japan; <sup>4</sup>Atopy Research Center, Juntendo University, Tokyo, 113-0033 Japan; <sup>5</sup>Animal Research Center, Tokyo Medical University, Tokyo, 160-8402, Japan; <sup>7</sup>Laboratory of Systems Biology, Center for Experimental Medicine and Systems Biology, The Institute of Medical Science, The University of Tokyo, Tokyo, 108-8639, Japan; <sup>8</sup>Precursory Research for Embryonic Science and Technology (PREST), Japan Science and Technology Agency, Saitama, Japan.

## Supplementary Figures

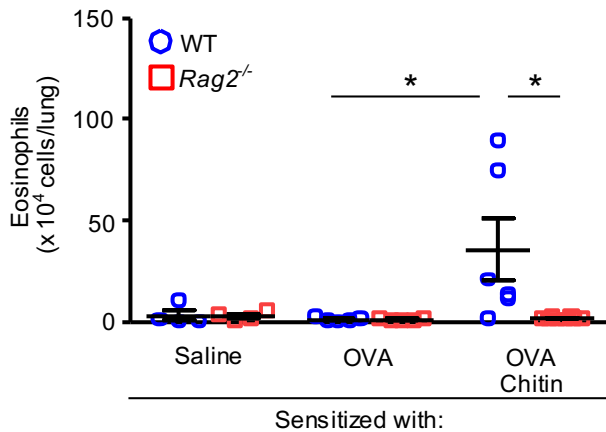

**Supplemental Figure 1.** OVA-specific T cells are essential for development of OVA-induced airway inflammation in the presence of chitin. The number of eosinophils in the BALFs from C57BL/6-wild-type and *-Rag2*<sup>-/-</sup> mice intranasally sensitized with or without OVA ± chitin and challenged with OVA, as shown in Fig. 1a. Data are shown as the mean ± SE. 1-way or 2-way ANOVA, \**P* < 0.05.

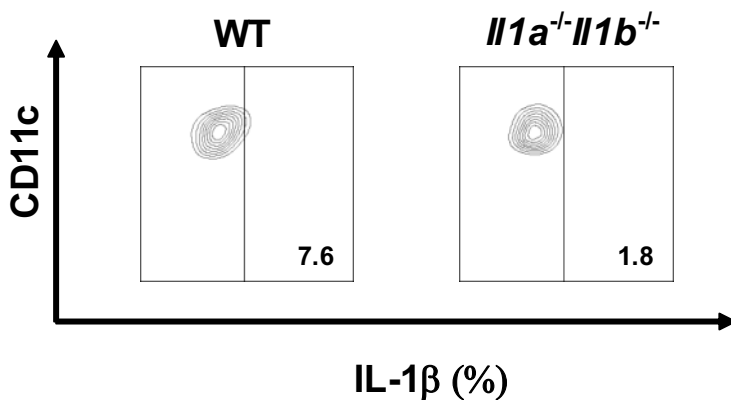

**Supplemental Figure 2.** Chitin induces IL-1β by DCs. C57BL/6-wild-type (n=3) and *-Il1a*<sup>-/-</sup>*Il1b*<sup>-/-</sup> (n=3) mice were intranasally treated with OVA+Chitin on 3 consecutive days. Twenty-four hours after the last treatment, thoracic LNs were harvested. The proportion of CD45<sup>+</sup> IL-1β-producing DCs in 7-AAD-negative I-A/I-E<sup>hi</sup>CD11c<sup>hi</sup> cells in the LNs was determined by flow cytometry. Data are shown as a representative data from 3-independent experiments.
